# Supplementary material for: The Inadequate Treatment of Pain: Collateral Damage from the War on Drugs
Source: PLoS Med. 2012 Jan 10;9(1):e1001153. doi: 10.1371/journal.pmed.1001153 (PMC3254657; doi:10.1371/journal.pmed.1001153)
Supplement: Table S1 — Morphine grams per capita versus gross national income. (XLS) [file pmed.1001153.s001.xls]

## Sheet: Sheet1
Country	GNI Per Capita	Morphine Quota (g)	Population (2010)	Low-Income Economies Morphine grams/capita	Lower Middle income countries morphine grams/capita	Upper middle income countries morphine grams/capita	High Income Countries morphine grams/capita
Afghanistan	290	4000	3.43851e+07	0.00011633
Albania	3960	4358	3204284			0.00136005
Algeria	4450	7000	35468208			0.00019736
Andorra	41750	502	84864				0.00591535
Angola	3940	4000	19081912		0.000209623
Antigua and Barbuda	10590	6	88710			6.76361e-05
Argentina	8500	680000	40412376			0.0168265
Armenia	3090	4500	3092072		0.00145533
Australia	43590	928158	22328800				0.0415678
Austria	46690	1830067	8.38475e+06				0.218261
Azerbaijan	5080	900	9047932			9.94702e-05
Bahamas, The	20610	800	342877				0.0023332
Bahrain	18730	7936	1261835				0.00628925
Bangladesh	700	100000	148692131	0.000672531
Barbados	12660	1634	273331				0.0059781
Belarus	6130	27136	9490500			0.00285928
Belgium	45360	6111295	10879159				0.561743
Belize	3740	4000	344700		0.0116043
Benin	780	2416	8849892	0.000272998
Bhutan	1880	289	725940		0.000398105
Bolivia	1810	5910	9929849		0.000595175
Bosnia and Herzegovina	4790	17001	3760149			0.00452136
Botswana	6790	2001	2006945			0.000997038
Brazil	9390	3000000	194946470			0.0153888
Brunei Darussalam	31800	1200	398920				0.00300812
Bulgaria	6250	114656	7543325			0.0151997
Burkina Faso	550	1600	16468714	9.71539e-05
Burundi	170	58	8382849	6.91889e-06
Cambodia	760	3000	14138255	0.00021219
Cameroon	1180	2485	19598889		0.000126793
Canada	41950	4322714	34108752				0.126733
Cape Verde	3270	400	495999		0.000806453
Central African Republic	470	3500	4401051	0.000795265
Chad	620	206	11227208	1.83483e-05
Chile	9950	98055	17113688			0.00572962
China	4260	9388925	1.3383e+09			0.00701556
Colombia	5510	298297	46294841			0.00644342
Comoros	750	500	734750	0.000680504
Congo, Dem. Rep.	180	45000	65965795	0.000682172
Congo, Rep.	2150	2100	4042899		0.000519429
Costa Rica	6550	33344	4658887			0.00715707
Cote d'Ivoire	1160	493	19737800		2.49775e-05
Croatia	13780	25000	4.42416e+06				0.00565079
Cuba	5520	62211	11257979			0.00552595
Cyprus	30480	4000	1103647				0.00362435
Czech Republic	17890	114294	10525090				0.0108592
Denmark	59210	630000	5544139				0.113634
Djibouti	1270	800	888716		0.000900175
Dominica	5410	501	67757			0.00739407
Dominican Republic	5000	10000	9927320			0.00100732
Ecuador	4290	15000	14464739			0.001037
Egypt, Arab Rep.	2440	18000	81121077		0.000221891
El Salvador	3360	4000	6192993		0.000645891
Eritrea	340	90	5253676	1.71309e-05
Estonia	14370	14125	1339646				0.0105438
Ethiopia	390	60000	82949541	0.000723331
Fiji	3580	424	860623		0.000492666
Finland	47160	41472	5363624				0.00773209
France	42390	87377110	6.48766e+07				1.34682
Gabon	7740	88	1505463			5.84538e-05
Gambia, The	450	188	1728394	0.000108771
Georgia	2690	17279	4452800		0.00388048
Germany	43290	1378849	81702329				0.0168765
Ghana	1230	10000	24391823		0.000409973
Greece	27260	21005	11319048				0.00185572
Grenada	5550	1000	104487			0.00957057
Guatemala	2730	6000	14388929		0.000416987
Guinea	400	2300	9981590	0.000230424
Guinea-Bissau	590	1400	1515224	0.000923956
Guyana	3300	4000	754493		0.00530157
Haiti	650	671	9993247	6.71453e-05
Honduras	1880	794	7600524		0.000104466
Hong Kong SAR, China	32780	42507	7067800				0.00601418
Hungary	12980	18052000	10008703				1.80363
Iceland	33990	19560	317398				0.0616261
India	1340	10412038	1170938000		0.00889205
Indonesia	2500	29430	239870937		0.000122691
Iran, Islamic Rep.	4520	35000	73973630			0.000473142
Iraq	2340	8000	3.20308e+07		0.000249759
Ireland	40720	87634	4481430				0.0195549
Israel	27170	102000	7624600				0.0133778
Italy	35150	6000000	60483521				0.0992006
Jamaica	4770	10000	2702300			0.00370055
Japan	42130	12826763	127450459				0.100641
Jordan	4390	38304	6047000			0.00633438
Kazakhstan	7440	24263	16316050			0.00148706
Kenya	790	30000	40512682	0.000740509
Kiribati	2010	64	99546		0.000642919
Korea, Rep.	19890	200000	48875000				0.00409207
Kyrgyz Republic	880	3500	5.36517e+06	0.000652356
Lao PDR	1040	4500	6200894		0.000725702
Latvia	11620	6400	2242916			0.00285343
Lebanon	9080	6800	4227597			0.00160848
Lesotho	1040	1000	2171318		0.00046055
Liberia	200	3000	3994122	0.000751104
Libya	12320	4000	6355112			0.000629415
Lithuania	11390	13288	3320656			0.00400162
Luxembourg	79630	5000	505831				0.00988472
Macao SAR, China	40030	4504	543656				0.00828465
Macedonia, FYR	4520	2399358	2060563			1.16442
Madagascar	430	246	20713819	1.18761e-05
Malawi	330	10000	14900841	0.000671103
Malaysia	7760	57616	28401017			0.00202866
Maldives	4240	387	315885			0.00122513
Mali	600	11500	15369809	0.00074822
Malta	18430	5605	412961				0.0135727
Marshall Islands	3450	150	54038		0.00277582
Mauritania	1030	80	3459773		2.31229e-05
Mauritius	7750	2000	1281214			0.00156102
Mexico	8930	400000	113423047			0.00352662
Micronesia, Fed. Sts.	2700	94	111064		0.000846359
Moldova	1810	9039	3562062		0.00253758
Mongolia	1850	13000	2756001		0.00471698
Montenegro	6620	1000	631490			0.00158356
Morocco	2900	16562	31951412		0.00051835
Mozambique	440	6000	23390765	0.000256511
Namibia	4500	15000	2283289			0.00656947
Nepal	480	29729	29959364	0.000992311
Netherlands	49750	595182	16612213				0.035828
New Zealand	29050	424013	4367800				0.097077
Nicaragua	1090	7470	5788163		0.00129056
Niger	370	5500	15511953	0.000354565
Nigeria	1180	90000	158423182		0.000568099
Norway	85340	2151561	4885240				0.440421
Oman	18260	14000	2782435				0.00503156
Pakistan	1050	15000	173593383		8.64088e-05
Palau	6470	60	20472			0.00293083
Panama	6980	6000	3516820			0.00170609
Papua New Guinea	1300	10000	6858266		0.00145809
Paraguay	2940	60000	6454548		0.00929577
Peru	4780	44764	29076512			0.00153952
Philippines	2060	38214	93260798		0.000409754
Poland	12410	293546	38187488				0.00768697
Portugal	21850	2485010	10642841				0.233491
Romania	7840	107620	21442012			0.00501912
Russian Federation	9910	149338	141750000			0.00105353
Rwanda	520	2000	10624005	0.000188253
Samoa	2860	300	183081		0.00163862
Sao Tome and Principe	1200	1	165397		6.04606e-06
Saudi Arabia	16190	61200	27448086				0.00222966
Senegal	1090	1500	12433728		0.00012064
Serbia	5810	24300	7292574			0.00333216
Seychelles	9760	409	86525			0.00472696
Sierra Leone	340	5000	5867536	0.000852146
Singapore	41430	10884	5076700				0.00214391
Slovak Republic	16210	15037126	5433456				2.76751
Slovenia	24000	62908	2052821				0.0306447
Solomon Islands	1030	121	538148		0.000224845
South Africa	6090	9100000	49991300			0.182032
Spain	31750	5204009	46081574				0.11293
Sri Lanka	2240	9000	20859949		0.000431449
St. Kitts and Nevis	9520	19	52402			0.000362582
St. Lucia	4970	600	174000			0.00344828
St. Vincent and the Grenadines	4850	2259	109333			0.0206616
Sudan	1270	1917	43551941		4.40164e-05
Suriname	5920	270	524636			0.000514643
Swaziland	2630	1600	1186056		0.00134901
Sweden	50000	700000	9379116				0.0746339
Switzerland	70030	401646	7825243				0.051327
Syrian Arab Republic	2790	7000	2.04466e+07		0.000342355
Tajikistan	800	3840	6878637	0.00055825
Tanzania	530	20000	44841226	0.000446018
Thailand	4150	491264	69122234			0.00710718
Timor-Leste	2220	1000	1124355		0.000889399
Togo	490	375	6027798	6.22118e-05
Tonga	3390	120	104058		0.0011532
Trinidad and Tobago	15400	20394	1341465				0.0152028
Tunisia	4060	27000	10549100			0.00255946
Turkey	9890	39347	72752325			0.000540835
Turkmenistan	3800	3954	5041995		0.000784213
Tuvalu	3700	1	9827		0.00010176
Uganda	500	30000	3.34247e+07	0.00089754
Ukraine	3010	52772	45870700		0.00115045
United Kingdom	38560	9500000	62218761				0.152687
United States	47240	103957036	309050816				0.336375
Uruguay	10590	19714	3356584			0.00587323
Uzbekistan	1280	5500	2.81604e+07		0.00019531
Vanuatu	2760	79	239651		0.000329646
Venezuela, RB	11590	200000	28834000			0.00693626
Vietnam	1110	70000	8.69365e+07		0.000805186
Yemen, Rep.	1070	3000	24052514		0.000124727
Zambia	1070	7000	12926409		0.000541527
Zimbabwe	460	11250	12571454	0.000894885
Medians				0.000502134	0.000530478	0.00313149	0.0168765
